# Supplementary material
Source: PubMed Central journal article supplement (PMC4077611)

## 1 Supplemental Methods File

### 2 Statistical analysis of measurement variability sources

3 Using two-stage nested ANOVA we characterized sources of variability among participants with  
4 a 'balanced' data set, including four FF determinations for group I analytes and two FF  
5 determinations for group II analytes (Supplemental Figure 1). We defined variability as due to  
6 factors between-women and between-follicles (contralateral), and due to analytic factors. Models  
7 were specified as  $Y_{ijk} = \mu + \text{sub}_i + \text{follicle}_{j(i)} + e_{k(ji)}$ ; where  $Y_{ijk}$  describes an analyte value for the  
8  $k$ th determination ( $k=1, 2$ ) collected from the  $j$ th follicle ( $j=1, 2$ ) from the  $i$ th woman ( $i=1, \dots,$   
9  $177$ ),  $\mu$  describes the grand mean for an analyte,  $\text{sub}_i$  describes the random effect of the  $i$ th  
10 woman on the grand mean,  $\text{follicle}_{j(i)}$  describes the random effect of the  $j$ th follicle nested in the  
11  $i$ th woman, and  $e_{k(ji)}$  describes the random effect of the  $k$ th determination nested within the  $j$ th  
12 follicle sampled from the  $i$ th woman. Under this model specification, sources of variability for  
13 Group I analytes were characterized in terms of sources between-women ( $\sigma^2_B$ ), between-follicles  
14 ( $\sigma^2_F$ ) and for analytic factors ( $\sigma^2_A$ ). For Group II analytes, we were unable to separate variability  
15 due to analytic factors from sources between-follicles.

16  
17 Total variance for an analyte was defined as  $\sigma^2_T = \sigma^2_B + \sigma^2_F + \sigma^2_A$  for Group I analytes, and  $\sigma^2_T =$   
18  $\sigma^2_B + \sigma^2_F$  for Group II analytes; relative contributions for each source to the total were calculated  
19 as proportions multiplied by 100 ( $\% \sigma^2_B$ ,  $\% \sigma^2_F$  and  $\% \sigma^2_A$ , respectively). The relative contributions  
20 for each source to total measurement variability were also characterized by demographic and  
21 clinical factors; we used F-tests to assess the significance of  $\sigma^2_F$  for analytes stratified by these  
22 factors. To test for differences between  $\sigma^2_F$  across demographic and clinical groups, we assessed  
23 overlap of 84% confidence intervals, which approximates a statistical test with type-1 error rate

24 ( $\alpha$ ) equal to 0.05 (1). We also characterized ratios of variability between-follicles to between-  
25 women ( $\% \sigma_F^2 : \% \sigma_B^2$ ), to provide an index of the relative contributions of these sources to the  
26 total, analogous to the index of individuality (2). The higher the value of this ratio, the more an  
27 analyte appeared to depend upon the individual follicle, while lower values were more dependent  
28 on the individual woman. Coefficients of variation (CV) were calculated as  $CV = \sqrt{\sigma_1^2} / \bar{x}_1$ , where  
29  $\sqrt{\sigma_1^2}$  represents the total variance and  $\bar{x}_1$  represents the mean value for an analyte. Intraclass  
30 correlation coefficients (ICC) were estimated as  $\sigma_B^2 / \sigma_T^2$ , with 95% confidence intervals (CIs)  
31 estimated using the inverse tan transformation of Smith's variance (3).

32

### 33 **References**

34

- 35 1. Julious SA. Using confidence intervals around individual means to assess statistical  
36 significance between two means. *Pharm Stat* 2004;3:217-22.
- 37 2. Fraser CG, Harris EK, Petersen PH. Generation and application of data on biological  
38 variation in clinical chemistry. *Crit Rev Clin Lab Sci* 1989;27:409-30.
- 39 3. Lachin JM. The role of measurement reliability in clinical trials. *Clinical trials (London,*  
40 *England)* 2004;1:553-66.

41

42

43

44

## Supplemental Tables File

**Supplemental Table 1.** Sample sizes for biologic variability analysis of HDL-particle associated follicular fluid analytes, by demographic factors.

| Follicular fluid analytes | Age (years) |     | BMI (kg/m <sup>2</sup> ) |           |     | Race      |       | Cigarette smoking |      |
|---------------------------|-------------|-----|--------------------------|-----------|-----|-----------|-------|-------------------|------|
|                           | <35         | ≥35 | <25                      | 25≤BMI<30 | ≥30 | Non-Asian | Asian | Never             | Ever |
| Group I:                  |             |     |                          |           |     |           |       |                   |      |
| HDL-cholesterol           | 28          | 90  | 83                       | 27        | 8   | 78        | 34    | 99                | 14   |
| Phospholipids             | 28          | 90  | 83                       | 27        | 8   | 78        | 34    | 99                | 14   |
| Triglycerides             | 28          | 90  | 83                       | 27        | 8   | 78        | 34    | 99                | 14   |
| Arylesterase              | 28          | 90  | 83                       | 27        | 8   | 78        | 34    | 99                | 14   |
| Paraoxonase               | 28          | 90  | 83                       | 27        | 8   | 78        | 34    | 99                | 14   |
| ApoA-1                    | 28          | 90  | 83                       | 27        | 8   | 78        | 34    | 99                | 14   |
| ApoA-2                    | 27          | 86  | 81                       | 25        | 7   | 75        | 33    | 96                | 14   |
| Group II:                 |             |     |                          |           |     |           |       |                   |      |
| Free cholesterol          | 30          | 95  | 85                       | 30        | 10  | 85        | 34    | 105               | 15   |
| Cholesteryl palmitate     | 30          | 95  | 85                       | 30        | 10  | 85        | 34    | 105               | 15   |
| Cholesteryl oleate        | 30          | 95  | 85                       | 30        | 10  | 85        | 34    | 105               | 15   |
| Cholesteryl linoleate     | 30          | 95  | 85                       | 30        | 10  | 85        | 34    | 105               | 15   |
| Cholesteryl arachidonate  | 30          | 95  | 85                       | 30        | 10  | 85        | 34    | 105               | 15   |
| Retinol                   | 29          | 93  | 86                       | 28        | 8   | 81        | 35    | 103               | 14   |
| β-carotene                | 29          | 93  | 86                       | 28        | 8   | 81        | 35    | 103               | 14   |
| β-cryptoxanthin           | 29          | 93  | 86                       | 28        | 8   | 81        | 35    | 103               | 14   |
| α-tocopherol              | 29          | 93  | 86                       | 28        | 8   | 81        | 35    | 103               | 14   |
| γ-tocopherol              | 29          | 93  | 86                       | 28        | 8   | 81        | 35    | 103               | 14   |
| Lutein/zeaxanthin         | 29          | 93  | 86                       | 28        | 8   | 81        | 35    | 103               | 14   |
| Lycopene                  | 29          | 93  | 86                       | 28        | 8   | 81        | 35    | 103               | 14   |

NOTE: Sample sizes varied due to missing demographic data and limited follicular fluid available for some analyses.

ApoA-1, apolipoprotein A-1; ApoA-2, apolipoprotein A-2; BMI, body mass index; HDL, high-density lipoprotein.

**Supplemental Table 2.** Sample sizes for biologic variability analysis of HDL-particle associated follicular fluid analytes, by clinical factors.

| Follicular fluid analytes | Diagnosis   |               |     | COS Protocol |                          |            |       |
|---------------------------|-------------|---------------|-----|--------------|--------------------------|------------|-------|
|                           | Male factor | Female factor | DOR | Unexplained  | Lupron<br>down regulated | Antagonist | Flare |
| <b>Group I:</b>           |             |               |     |              |                          |            |       |
| HDL-cholesterol           | 35          | 23            | 15  | 44           | 82                       | 30         | 6     |
| Phospholipids             | 35          | 23            | 15  | 44           | 82                       | 30         | 6     |
| Triglycerides             | 35          | 23            | 15  | 44           | 82                       | 30         | 6     |
| Arylesterase              | 35          | 23            | 15  | 44           | 82                       | 30         | 6     |
| Paraoxonase               | 35          | 23            | 15  | 44           | 82                       | 30         | 6     |
| ApoA-1                    | 35          | 23            | 15  | 44           | 82                       | 30         | 6     |
| ApoA-2                    | 33          | 21            | 15  | 43           | 78                       | 29         | 6     |
| <b>Group II:</b>          |             |               |     |              |                          |            |       |
| Free cholesterol          | 38          | 23            | 18  | 44           | 84                       | 34         | 7     |
| Cholesteryl palmitate     | 38          | 23            | 18  | 44           | 84                       | 34         | 7     |
| Cholesteryl oleate        | 38          | 23            | 18  | 44           | 84                       | 34         | 7     |
| Cholesteryl linoleate     | 38          | 23            | 18  | 44           | 84                       | 34         | 7     |
| Cholesteryl arachidonate  | 38          | 23            | 18  | 44           | 84                       | 34         | 7     |
| Retinol                   | 37          | 21            | 18  | 45           | 83                       | 32         | 7     |
| $\beta$ -carotene         | 37          | 21            | 18  | 45           | 83                       | 32         | 7     |
| $\beta$ -cryptoxanthin    | 37          | 21            | 18  | 45           | 83                       | 32         | 7     |
| $\alpha$ -tocopherol      | 37          | 21            | 18  | 45           | 83                       | 32         | 7     |
| $\gamma$ -tocopherol      | 37          | 21            | 18  | 45           | 83                       | 32         | 7     |
| Lutein/zeaxanthin         | 37          | 21            | 18  | 45           | 83                       | 32         | 7     |
| Lycopene                  | 37          | 21            | 18  | 45           | 83                       | 32         | 7     |

NOTE: Sample sizes varied due to limited follicular fluid available for some analyses.

DOR, diminished ovarian reserve; COS, controlled ovarian stimulation; ApoA-1, apolipoprotein A-1; ApoA-2, apolipoprotein A-2;  $\sigma^2_A$ , variability attributed to analytic factors;  $\sigma^2_B$ , variability between-women;  $\sigma^2_F$ , variability between-follicles.

## Supplemental Figures File

**Supplemental Figure 1.** Sampling strategy for the measurement of follicular fluid (FF) high-density lipoprotein (HDL) analytes collected from *in vitro* fertilization patients: a) Group I analytes included HDL-cholesterol, phospholipids, triglycerides, apolipoproteins (ApoA-1 and ApoA-2), arylesterase and paraoxonase, for which two determinations were made per sampled follicle; b) Group II analytes included free cholesterol, cholesteryl palmitate, cholesteryl oleate, cholesteryl linoleate, cholesteryl arachidonate, retinol,  $\beta$ -carotene,  $\beta$ -cryptoxanthin,  $\alpha$ -tocopherol,  $\gamma$ -tocopherol, lutein/zeaxanthin and lycopene, for which one determination was made per sampled follicle.

**Supplemental Figure 2.** Intraclass correlation coefficients (ICCs, 95% confidence intervals (CIs)) for follicular fluid analytes measured in specimens collected from contralateral ovaries, including HDL-cholesterol, phospholipids, triglycerides, arylesterase, paraoxonase, apolipoprotein A-1 (ApoA-1) and A-2 (ApoA-2), free cholesterol, cholesteryl palmitate, cholesteryl oleate, cholesteryl linoleate, cholesteryl arachidonate, retinol,  $\beta$ -carotene,  $\beta$ -cryptoxanthin,  $\alpha$ -tocopherol,  $\gamma$ -tocopherol, lutein/zeaxanthin and lycopene.

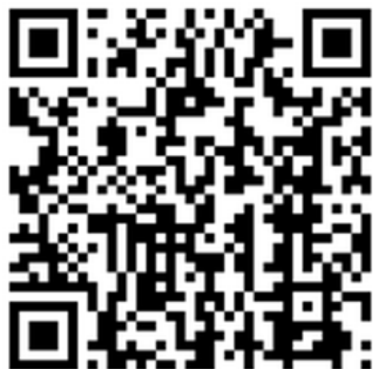

ACCEPTED MANUSCRIPT

a.

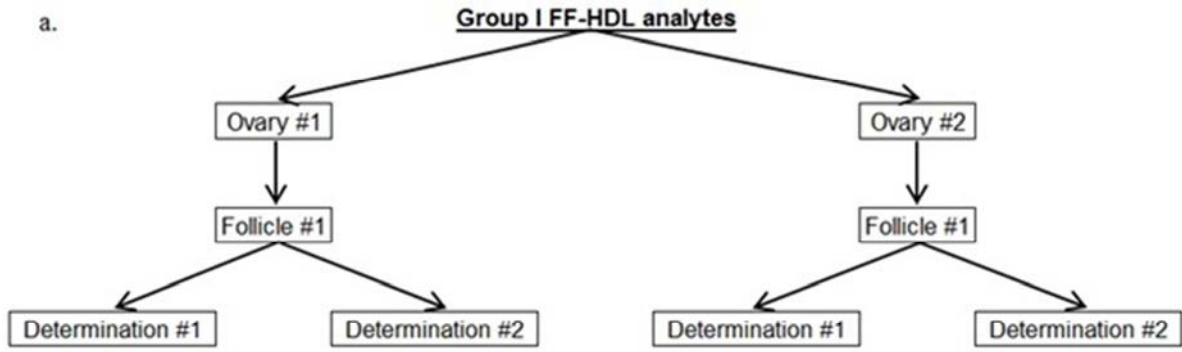

b.

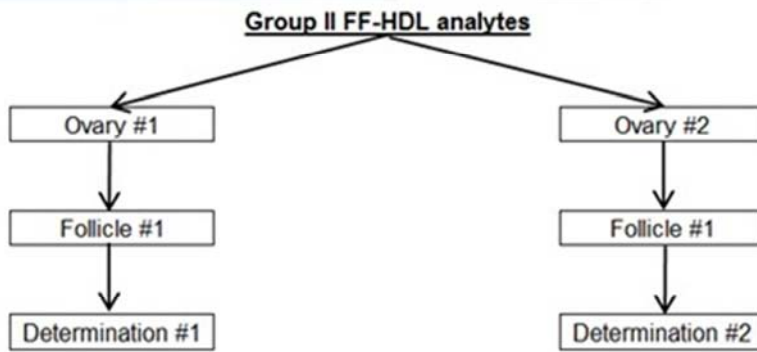

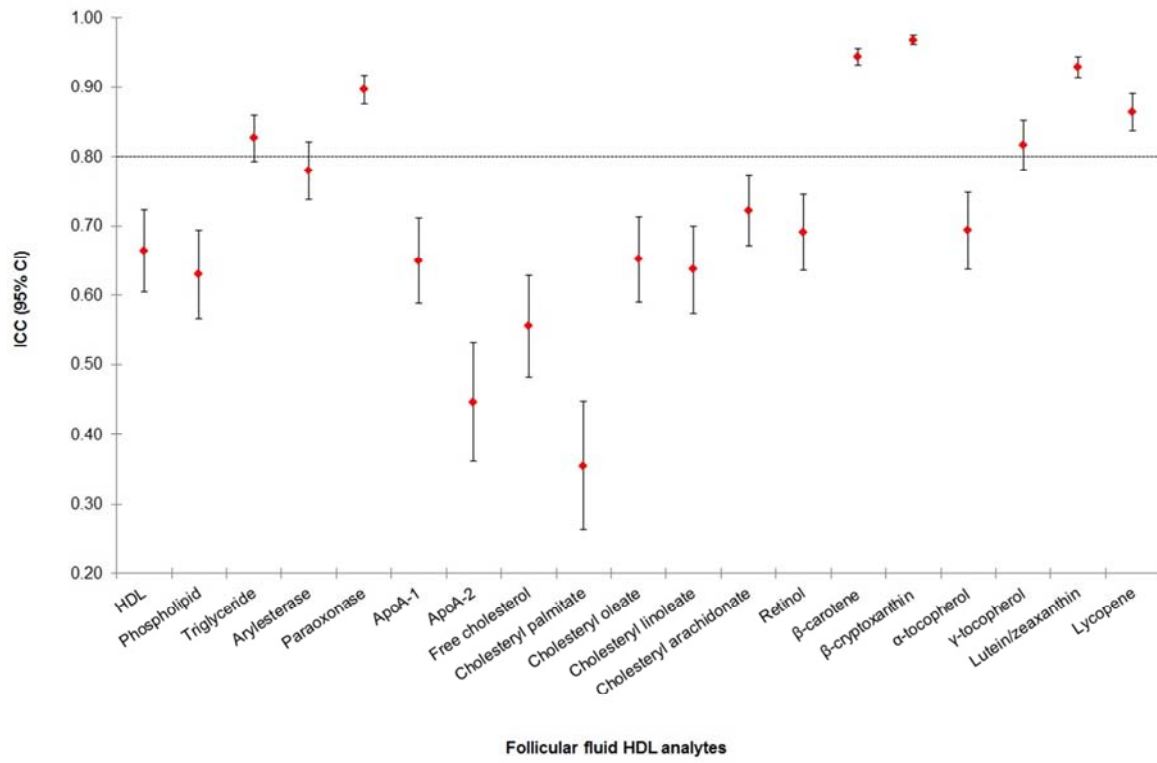

Supplement: NIHMS571169-supplement-supplement_1.pdf [file NIHMS571169-supplement-supplement_1.pdf]
